# Supplementary material for: Limited Sampling Strategy for Determination of Ibrutinib Plasma Exposure: Joint Analyses with Metabolite Data
Source: PubMed Central journal article supplement (PMC7922501; doi:10.3390/ph14020162), 2021-02-18
Supplement: pharmaceuticals-14-00162-s001.pdf [file pharmaceuticals-14-00162-s001.pdf]

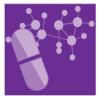

SUPPLEMENTARY

Supplementary Table S1: Performance of LSS to predict AUC ANTI-BTK

Development cohort

| N_point | LSS      | N  | MEAN | RMSE  | MPE   | nP20 | P20 |
|---------|----------|----|------|-------|-------|------|-----|
| 4       | T0_1_2_4 | 85 | 31.2 | 10.3% | +0.8% | 2    | 2%  |
| 3       | T0_1_4   | 85 | 31.2 | 11.3% | +0.3% | 6    | 7%  |
| 3       | T0_2_4   | 85 | 31.2 | 16.2% | -1.1% | 14   | 16% |

Validation cohort

| N_point | LSS      | N  | MEAN | RMSE  | MPE   | nP20 | P20 |
|---------|----------|----|------|-------|-------|------|-----|
| 4       | T0_1_2_4 | 27 | 27.2 | 5.9%  | +2.8% | 0    | 0%  |
| 3       | T0_2_4   | 27 | 27.2 | 7.3%  | +2.9% | 1    | 4%  |
| 3       | T0_1_4   | 27 | 27.2 | 15.8% | +0.5% | 5    | 19% |

Supplementary Figure S1: Diagram of the pharmacokinetic model

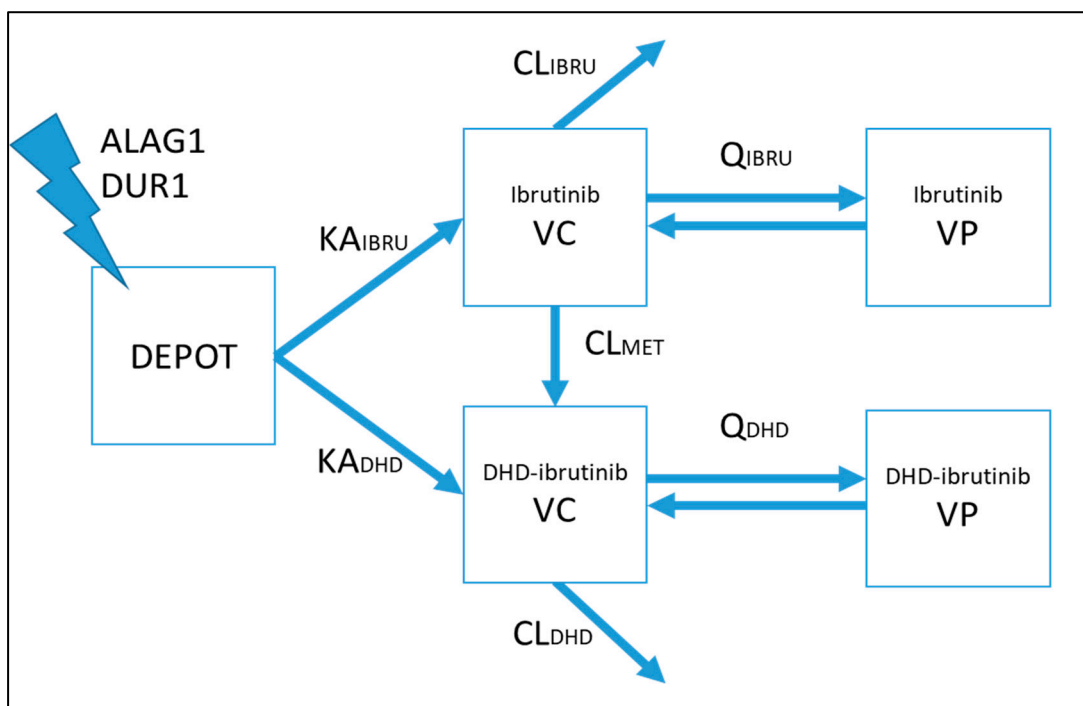

ALAG1, Lag time in compartment 1; DEPOT, Drug Depot; DHD, Dihydrodiol-ibrutinib; DUR1 Duration of infusion in compartment 1;  $K_{ADHD}$ , Absorption rate constant for DHD;  $K_{AIBRU}$ , Absorption rate constant for ibrutinib;  $CL_{DHD}$ , DHD clearance;  $CL_{IBRU}$ , Ibrutinib clearance;  $CL_{MET}$ , metabolic clearance;  $Q_{DHD}$ , intercompartmental DHD clearance,  $Q_{IBRU}$  intercompartmental ibrutinib clearance; VC; Central Volume of distribution; VP; Peripheral Volume of distribution.

Supplementary Table S2: Control stream PK model

```

$SUBROUTINES ADVAN5 SS5

$MODEL
COMP=(DEPOT,DEFDOSE)
COMP=(IBRU_CENT,DEFOBS)
COMP=(IBRU_PERIPH)
COMP=(DHDIBRU)
COMP=(DHDIBRU_PERIPH)

$PK
OCC1=0
OCC2=0
OCC3=0
OCC6=0
IF(MONTH.EQ.1) OCC1=1
IF(MONTH.EQ.2) OCC2=1
IF(MONTH.EQ.3) OCC3=1
IF(MONTH.EQ.6) OCC6=1

;IBRU
CLMET = THETA(1) * EXP(ETA(6))
V2 = THETA(2) * EXP(ETA(2))
KA = THETA(3)
Q = THETA(4)
V3 = THETA(5) * EXP(ETA(1))
ALAG1 = THETA(6) * EXP(ETA(7))
D1 = THETA(7) * EXP(ETA(8))
CLIBRU = THETA(8) * EXP(ETA(4)) + ETA(9)*OCC1 + ETA(10)*OCC2 + ETA(11)*OCC3 +
ETA(12)*OCC6

;DHD-IBRU
CLDHD = THETA(9) * EXP(ETA(3)) + ETA(13)*OCC1 + ETA(14)*OCC2 + ETA(15)*OCC3 +
ETA(16)*OCC6
V4 = V2
V5 = V3
K14 = THETA(10) * EXP(ETA(5))
QDHD = THETA(11)

K12 = KA
K23 = Q / V2
K32 = Q / V3
K24 = CLMET / V2
K40 = CLDHD / V4
K20 = CLIBRU / V2
K45 = QDHD / V4
K54 = QDHD / V5

S2 = V2 /1000
S4 = V4 /1000

$ERROR

```

DEL=0

IF (F.EQ.0) DEL=1

W=F+DEL

IF(CMT.EQ.2) Y=F+W\*EPS(1)

IF(CMT.EQ.4) Y=F+W\*EPS(2)

IPRED=F

IRES=DV-IPRED

IWRES=IRES/W

\$THETA

149.622 FIXED ; 1 CL MET

1005.03 FIXED ; 2 V2

1.55664 FIXED ; 3 KA

171.094 FIXED ; 4 Q

1481.01 FIXED ; 5 V3

.238192 FIXED ; 6 ALAG1

.988671 FIXED ; 7 D1

241.899 FIXED ; 8 CLIBRU

180.972 FIXED ; 9 CLDHD

1.20812 FIXED ;10 K14

50.3012 FIXED ;11 QDHD

\$OMEGA BLOCK(6)

0.465173 FIXED ; iiv V3

0.432131 0.512330000 ; iiv V2

0.220876 0.217668000 0.228809 ; iiv CLDHD

0.374779 0.421162000 0.195424 0.3658180 ; iiv CLIBRU

0.298891 0.287158000 0.156798 0.2487940 0.345464 ; iiv K14

0.000000 0.000591386 0.180014 0.0217671 0.129532 0.347017000 ; iiv CLMET

\$OMEGA BLOCK(2)

0.501473 FIXED ; iiv ALAG1

0.282336 0.844851 ; iiv D1

\$OMEGA BLOCK(1) 0.197216 FIXED;IOV CLIBRU

\$OMEGA BLOCK(1) SAME ;IOV CLIBRU

\$OMEGA BLOCK(1) SAME ;IOV CLIBRU

\$OMEGA BLOCK(1) SAME ;IOV CLIBRU

\$OMEGA BLOCK(1) 0.0637684 FIXED;IOV CLDHD

\$OMEGA BLOCK(1) SAME ;IOV CLDHD

\$OMEGA BLOCK(1) SAME ;IOV CLDHD

\$OMEGA BLOCK(1) SAME ;IOV CLDHD

\$SIGMA

0.128496 FIXED

0.0639887 FIXED

\$ESTIMATION METHOD=1 INTERACTION MAXEVAL=0 SIGDIGITS=3 NOABORT

\$COV UNCONDITIONAL
